# Supplementary material
Source: PubMed Central journal article supplement (PMC1584345)
Supplement: bmj_333_7570_685__1.pdf [file bmj_333_7570_685__1.pdf]

### Extra references

- w1. Maiden MC. Dynamics of bacterial carriage and disease: lessons from the meningococcus. *Adv Exp Med Biol* 2004;549:23-9.
- w2. Texereau J, Pene F, Chiche J D, Rousseau C, Mira JP. Importance of hemostatic gene polymorphisms for susceptibility to and outcome of severe sepsis. *Crit Care Med* 2004;32:S313-9.
- w3. Department of Health. *Meningococcal C vaccine (meningitis C) factsheet*. London: Department of Health and the Health Education Authority, 1999 ([www.immunisation.nhs.uk/files/mencfsht.pdf](http://www.immunisation.nhs.uk/files/mencfsht.pdf)).
- w4. Cartwright K, Strang J, Gossain S, Begg N. Early treatment of meningococcal disease. *BMJ* 1992;305:774.
- w5. Keeley D. Parenteral penicillin before admission to hospital for meningitis. *BMJ* 2006;332:1283-4.
- w6. Pollard AJ, Britto J, Nadel S, DeMunter C, Habibi P, Levin M. Emergency management of meningococcal disease. *Arch Dis Child* 1999;80:290-6.
- w7. Booy R, Habibi P, Nadel S, de Munter C, Britto J, Morrison A, et al. Reduction in case fatality rate from meningococcal disease associated with improved healthcare delivery. *Arch Dis Child* 2001;85:386-90.
- w8. Goldacre MJ, Roberts SE, Yeates D. Case fatality rates for meningococcal disease in an English population, 1963-98: database study. *BMJ* 2003;327:596-7.
- w9. Oliver KJ, Reddin KM, Bracegirdle P, Hudson MJ, Borrow R, Feavers IM, et al. *Neisseria lactamica* protects against experimental meningococcal infection. *Infect Immun* 2002;70:3621-6.
